# Supplementary material
Source: HighWire-hosted journal article supplement (https://heart.bmj.com/content/105/22/1741)
Supplement: inline-supplementary-material-1 [file inline-supplementary-material-1.docx]

**Supplemental Table. Conventional surgery performed in preference to listing for transplantation or where transplantation was contra-indicated and subsequent outcomes**

| **No** | **Type of Surgery** | **Indication vs OHT** | **Group** | **Outcome** |
| --- | --- | --- | --- | --- |
| 1 | Aortic valve replacement (25mm Carbomedics) and root replacement | Preferred option | LV | Alive at latest follow-up (96.1 months) |
| 2 | Aortic valve replacement (23mm Carbomedics), root replacement and atrial MAZE | PVR too high | LV | Alive at latest follow-up (139.8 months) |
| 3 | Aortic valve replacement (25 mm Perimount Magna) patch enlargement of right coronary orifice, pacemaker | Preferred option | LV | Transplanted at 13.0 months |
| 4 | Pulmonary valve replacement (25mm Perimount), tricuspid valve repair, pacemaker | Preferred option | LV | Alive at latest follow-up (93.3 months) |
| 5 | Tricuspid valve replacement (31mm Perimount Magna Ease), cavopulmonary shunt, pacemaker | Preferred option | LV | Died 8.4 months following surgery |
| 6 | Tricuspid valve replacement (33mm Perimount) | PRAs too high | LV | Alive at latest follow-up (78.8 months) |
| 7 | Tricuspid valve replacement (29 mm St Jude Epic) and ECMO decannulation | Too unwell to wait | LV | Alive at latest follow-up (73.3 months) |
| 8 | Revision of left ventricular to pulmonary artery conduit, pacemaker upgrade | Preferred option | RV | Alive at latest follow-up (59.3 months) |
| 9 | Fontan conversion with patch reconstruction of pulmonary arteries, MAZE procedure | Anatomically unsuitable/ PRAs too high | SV | Died 12.3 months following surgery |
| 10 | Fontan Revision (Emergency) | Too unwell to wait | SV | Died 1.0 month following surgery |
| 11 | Aortic valve replacement (size 23 Carbomedics) | Preferred option | SV | Died one day after surgery |
| 12 | Tricuspid valve replacement and left pulmonary artery thrombectomy | Anatomically unsuitable | SV | Died 9.6 months following surgery |
| 13 | Stented Atrial Septum (bridge to lower PVR) | Preferred option | SV | Alive at latest follow up (14.4 months) |

ECMO: extra-corporeal membrane oxygenation, LV: left ventricle group, OHT: orthotopic heart transplant, PRA: panel reactive antibodies, PVR: pulmonary vascular resistance, RV: right ventricle group, SV: single ventricle group
